# Supplementary material for: Preparation and biological characterization of hollow magnetic Fe3O4@C nanoparticles as drug carriers with high drug loading capability, pH-control drug release and MRI properties
Source: Royal Society of Chemistry journal article supplement (doi:10.1039/c3bm60087d), 2013-01-01
Supplement: c3bm60087d.pdf [file c3bm60087d.pdf]

## Supporting Information

### Preparation and Biological Characterization of Fe<sub>3</sub>O<sub>4</sub>@C Nanocapsules as Drug Carriers with pH-Triggered Drug Release and MRI Properties

Kai Cheng<sup>a,+</sup>, Zhiyuan Sun<sup>a,+</sup>, Yumei Zhou<sup>a</sup>, Hao Zhong<sup>a</sup>, Zhen Guo<sup>b,\*</sup>, Qianwang Chen<sup>a</sup>

<sup>a</sup> Department of Materials Science & Engineering, University of Science and Technology of China, Hefei, 230026, China.

<sup>b</sup> Anhui Key Laboratory for Cellular Dynamics and Chemical Biology, School of Life Sciences, University of Science and Technology of China, Hefei 230027, China

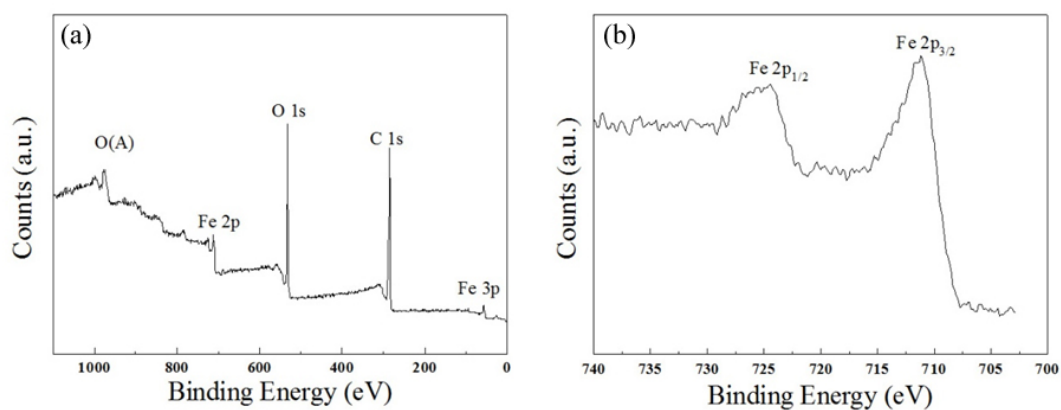

**Fig. S1** (a) XPS spectrum of sample; (b) The expanded XPS spectrum of Fe 2p.

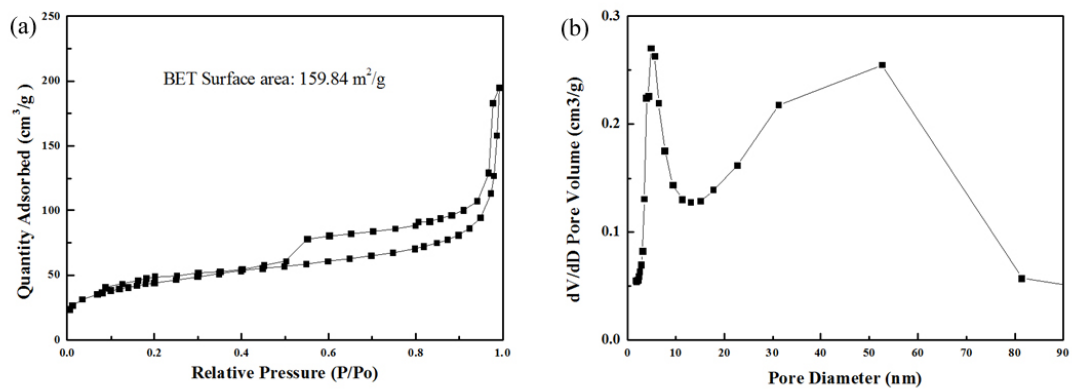

**Fig. S2** (a) Nitrogen adsorption-desorption isotherm of Fe<sub>3</sub>O<sub>4</sub>@C nanocapsules; (b) mesopore distribution of Fe<sub>3</sub>O<sub>4</sub>@C calculated by BJH method.

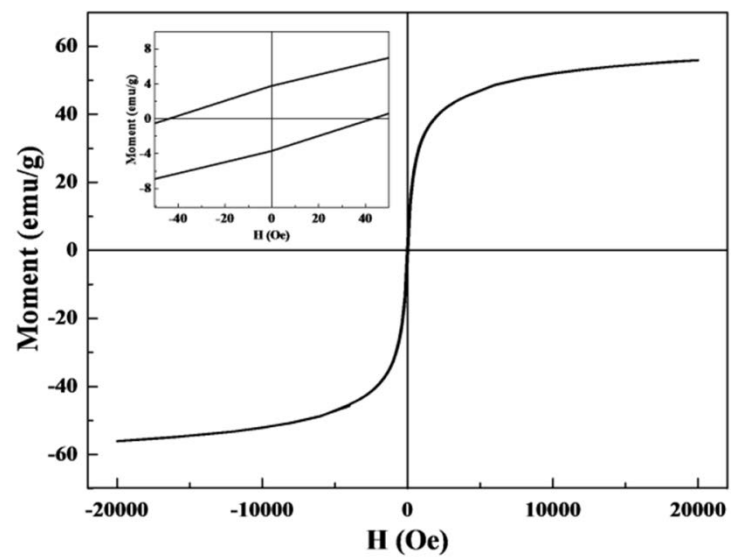

**Fig. S3** Magnetic hysteresis loop of the Fe<sub>3</sub>O<sub>4</sub>@C nanocapsules and the insert is the enlarged drawing around the original point.

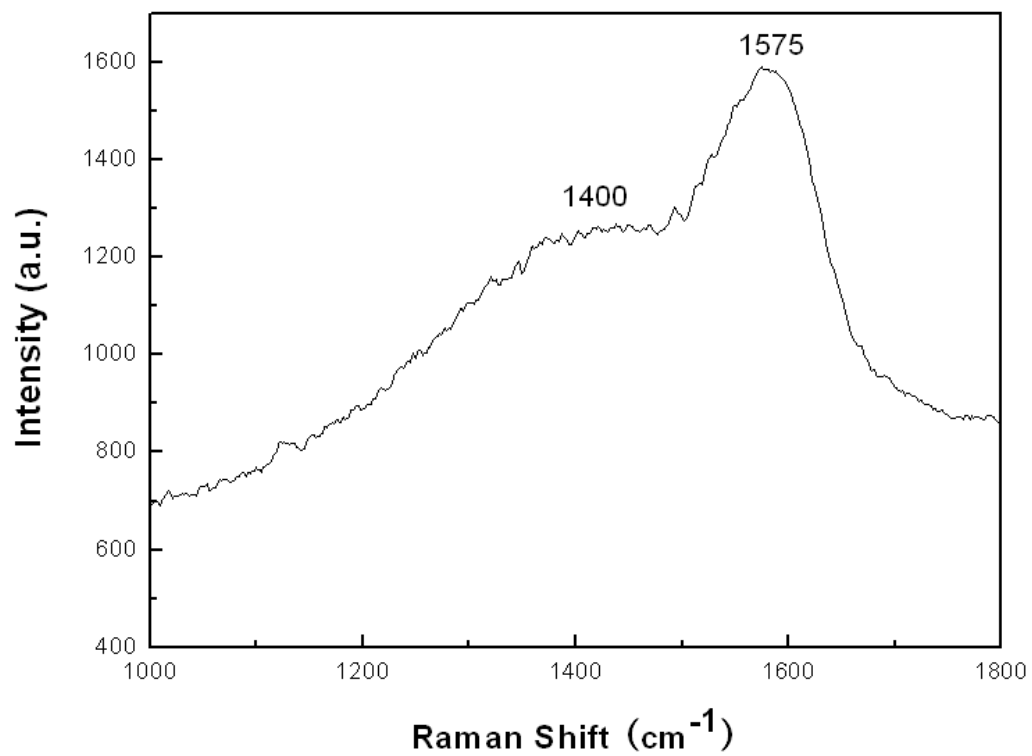

**Fig. S4** Raman spectrum of Fe<sub>3</sub>O<sub>4</sub>@C nanocapsules

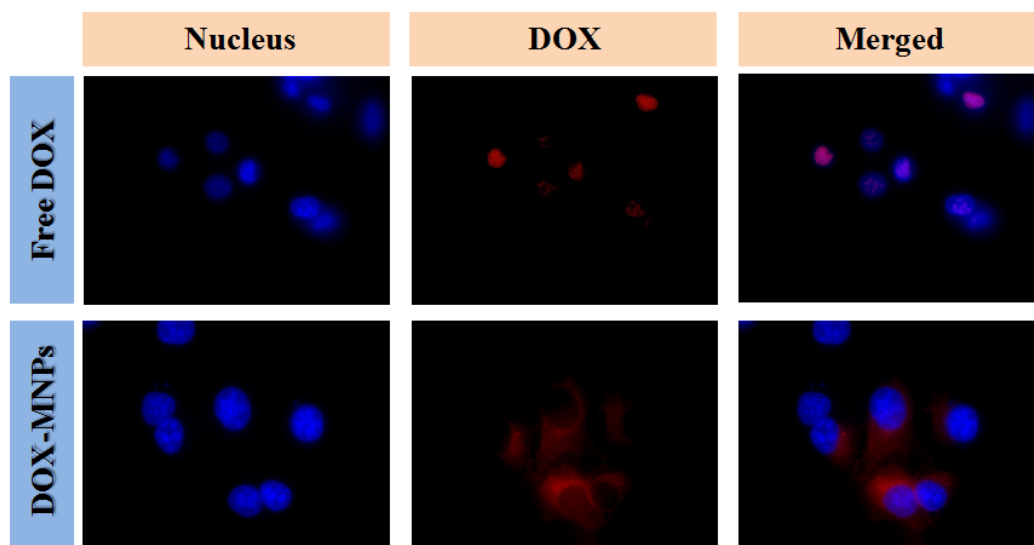

**Fig. S5** Confocal laser microscopic observation of MCF-7 cells cultured with free DOX or DOX-HMNPs for 24h. The dose of DOX or its equivalent was 5  $\mu\text{g}/\text{mL}$  in the cell culture. The cells were counterstained with DAPI (blue) for the cell nucleus.
